# Supplementary material
Source: MDPI journal article supplement (https://www.mdpi.com/2079-6412/14/2/227)
Supplement: s1 [file s1]

# Polypyrrole/ $\alpha$ -Fe<sub>2</sub>O<sub>3</sub> Hybrids for enhanced Electrochemical Sensing

## Performance towards Uric Acid

Renjie Wang <sup>\*,†</sup>, Shanshan Liu <sup>†</sup>, Xudong Song <sup>\*,†</sup>, Kai Jiang, Yaohui Hou, Qiaohuan

Cheng, Wei Miao, Li Tian <sup>\*</sup>, Ying Ren and Sankui Xu

College of Materials Science & Engineering, Henan University of Technology, Zhengzhou

450001, China

\*Correspondence: renjie\_wang@haut.edu.cn (R.W.); songxudong@haut.edu.cn

(X.S.);tianli@haut.edu.cn (L.T.)

<sup>†</sup>These authors contributed equally to this work.

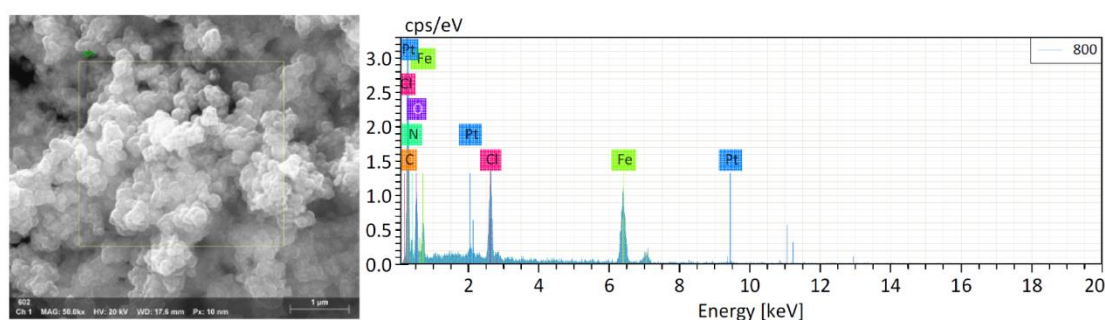

**Figure S1.** EDS mapping of PPy/ $\alpha$ -Fe<sub>2</sub>O<sub>3</sub> composite.

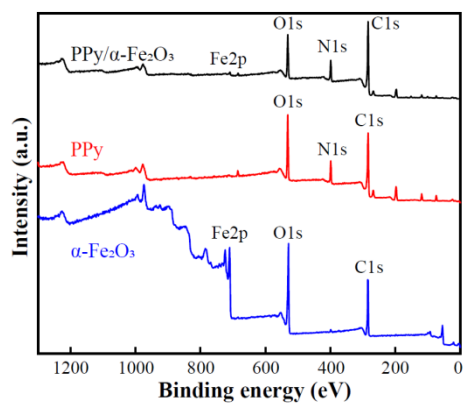

**Figure S2.** The XPS spectra of  $\alpha$ -Fe<sub>2</sub>O<sub>3</sub>, PPy, and PPy/ $\alpha$ -Fe<sub>2</sub>O<sub>3</sub> composite.

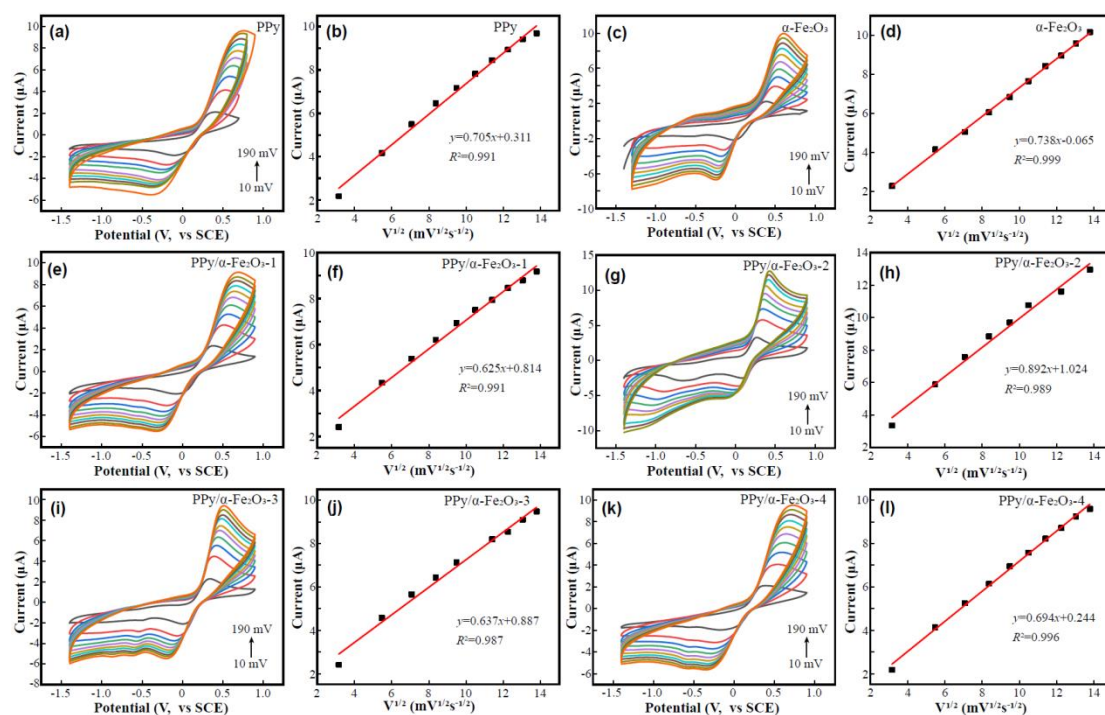

Figure S3. CV curves and the dependence plots of anodic peak current vs square root of scan rate of (a-b) PPY, (c-d)  $\alpha\text{-Fe}_2\text{O}_3$ , (e-f) PPY/ $\alpha\text{-Fe}_2\text{O}_3$ -1, (g-h) PPY/ $\alpha\text{-Fe}_2\text{O}_3$ -2, (i-j) PPY/ $\alpha\text{-Fe}_2\text{O}_3$ -3, and (k-l) PPY/ $\alpha\text{-Fe}_2\text{O}_3$ -4 in 0.1 M KCl solution containing 5 mM  $[\text{Fe}(\text{CN})_6]^{3-/4-}$ .

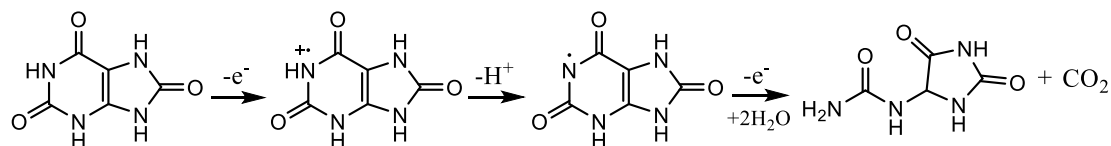

Figure S4. The probable reaction mechanisms of UA on PPY/ $\alpha\text{-Fe}_2\text{O}_3$  electrode.

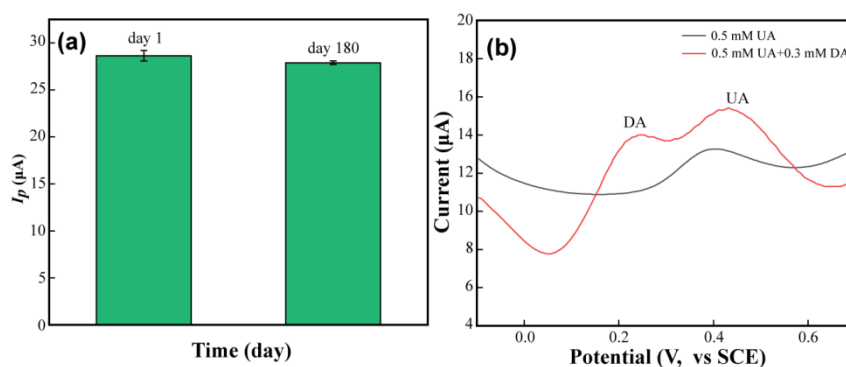

Figure S5. (a) Storage stability of the PPY/ $\alpha\text{-Fe}_2\text{O}_3$  electrode tested by CV for 180 days. (b) DPV curves of the PPY/ $\alpha\text{-Fe}_2\text{O}_3$  electrode were obtained in a solution containing 0.5 mM UA, and 0.3 mM DA their mixtures, respectively.
